# Supplementary material for: Silicon-based spectrally selective emitters with good high-temperature stability on stepped metasurfaces
Source: Royal Society of Chemistry journal article supplement (doi:10.1039/d2nr02299k), 2022-01-01
Supplement: d2nr02299k1.pdf [file d2nr02299k1.pdf]

***Supporting Information to***

**Silicon-based Spectrally Selective Emitters with Excellent High-Temperature Stability on Stepped Metasurface**

Yu Zhu, Guozhi Hou, Qingyuan Wang, Ting Zhu, Teng Sun, Jun Xu\*, and Kunji Chen

National Laboratory of Solid State Microstructures/School of Electronics Science and Engineering/Collaborative Innovation Center of Advanced Microstructures, Nanjing University, Nanjing, 210093, P. R. China

Emails: junxu@nju.edu.cn

**Contents**

**Section 1 SEM characterizations of the hybrid silicon-based structures and absorption spectra of Si stepped NPs**

**Section 2 Absorption spectra of the hybrid silicon-based structures**

**Section 3 FDTD simulation of the hybrid silicon-based structures**

**Section 4 Annealing tests of the hybrid silicon-based metasurface emitter**

**Section 5 Comparison of performance and fabrication characteristics**

## Section 1 SEM characterizations of the hybrid silicon-based structures and absorption spectra of Si stepped NPs

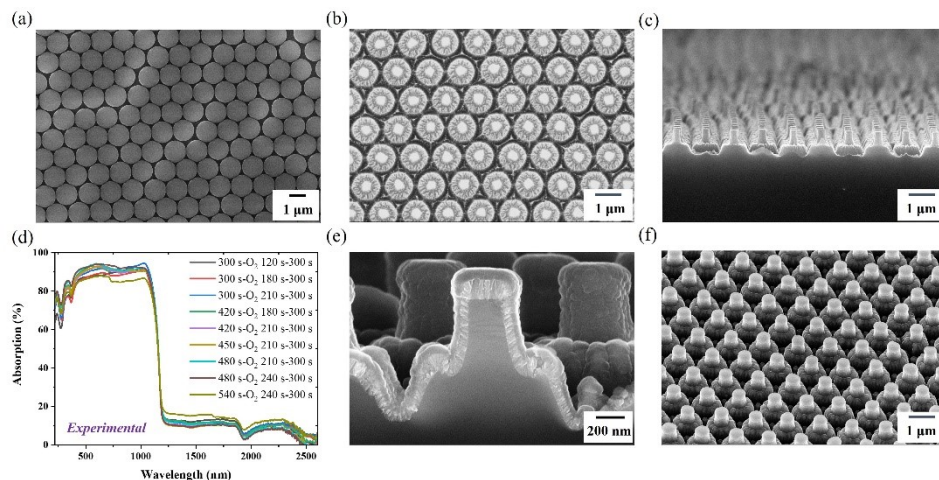

**Figure S1** (a) SEM image of a Si wafer coated with a monolayer of close-packed PS nanospheres. (b-c) Top-view and side-view SEM characterizations of the Si stepped NPs (ICP etching parameters: 300 s-O<sub>2</sub> 210 s-300 s). (d) Absorption spectra of Si stepped NPs with different ICP etching parameters. (e) Sectional-view SEM image of the hybrid Si stepped NP/Mo/SiN<sub>x</sub> structure. (f) SEM image at a 45° tilted view of the hybrid Si stepped NP/Mo/SiN<sub>x</sub> structure.

## Section 2 Absorption spectra of the hybrid silicon-based structures

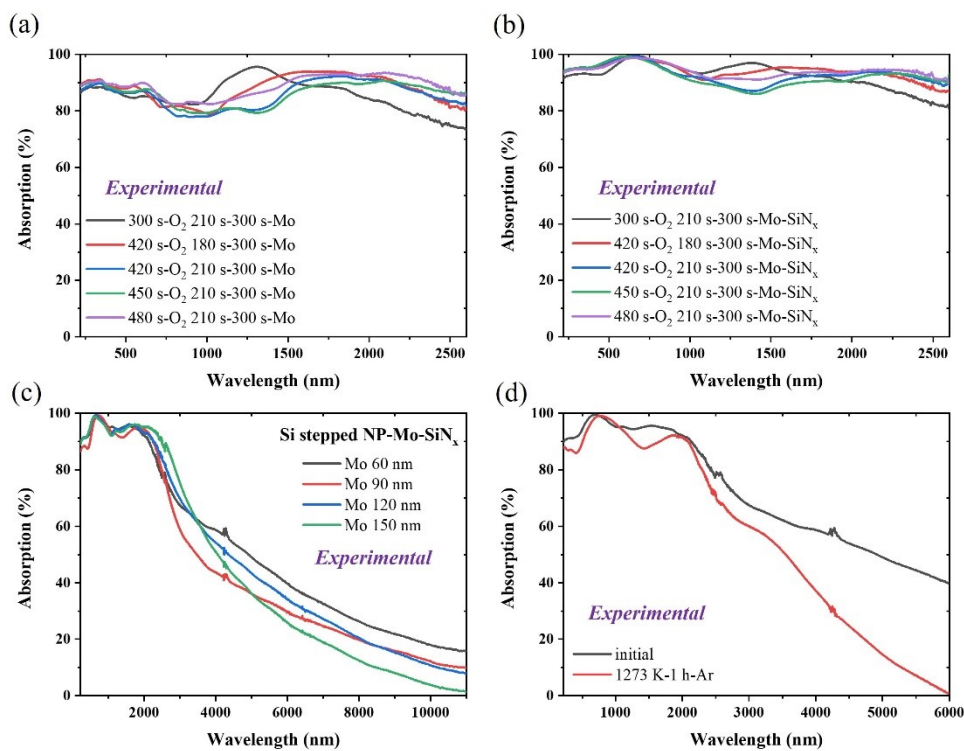

**Figure S2** (a) Absorption spectra of the Si stepped NPs with different ICP etching parameters coated with 30 nm Mo. (b) Absorption spectra of the Si stepped NPs with different ICP etching parameters coated with 30 nm Mo and

36 nm thick  $\text{SiN}_x$ . (c) Absorption spectra of the hybrid silicon-based metasurface emitter from 220 nm to 11000 nm with 60, 90, 120, 150 nm thick Mo. (d) Absorption spectra of the metasurface emitter taken at room temperature in the wavelength range of 220 nm- 6000 nm, before and after annealing at 1273 K in Ar atmosphere for 1 h.

### Section 3 *FDTD simulation of the hybrid silicon-based structures*

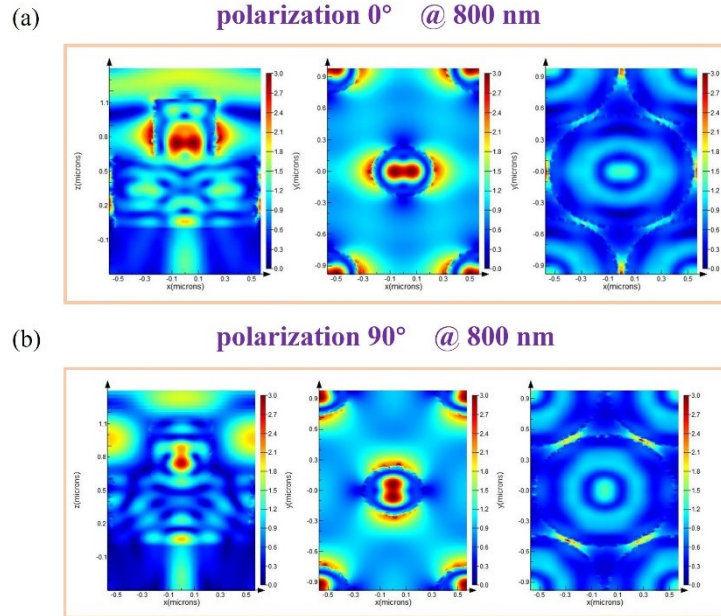

**Figure S3** (a, b) Simulated electric field distribution of the hybrid Si stepped NP/Mo/ $\text{SiN}_x$  structure at 800 nm with polarization angles of  $0^\circ$  and  $90^\circ$ .

### Section 4 *Annealing tests of the hybrid silicon-based metasurface emitter*

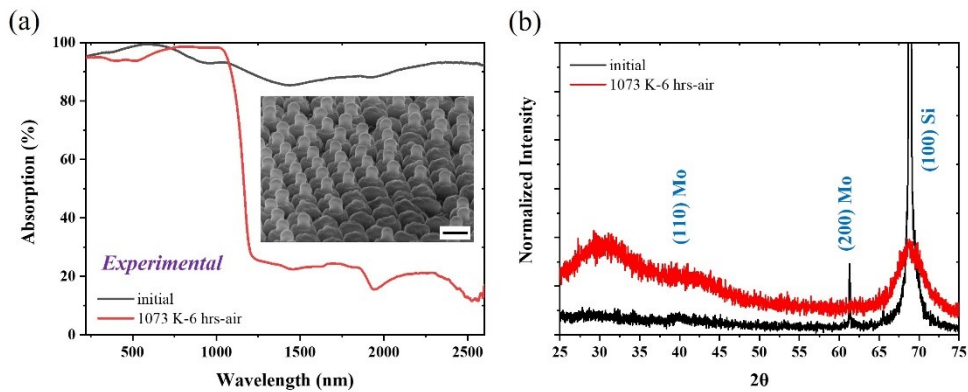

**Figure S4** (a) Absorption spectra and SEM images of the hybrid silicon-based metasurface emitter taken at room temperature, before and after annealing at 1073 K in the air for 6hrs. Scale bar: 1  $\mu\text{m}$ . The corresponding XRD patterns are shown in (b).

### Section 5 *Comparison of performance and fabrication characteristics*

| Sample parameters                             | Average absorptivity in the visible wavelength range (400nm-780nm) | Average absorptivity from 220nm to 2000nm | Absorptivity corresponding to the interference peak | Wavelength corresponding to the interference peak |
|-----------------------------------------------|--------------------------------------------------------------------|-------------------------------------------|-----------------------------------------------------|---------------------------------------------------|
| Si stepped NP-Mo 120nm-SiN <sub>x</sub> 0 nm  | 86.861%                                                            | 87.783%                                   | 94.019%                                             | 1452 nm                                           |
| Si stepped NP-Mo 120nm-SiN <sub>x</sub> 24 nm | 95.404%                                                            | 91.913%                                   | 97.667%                                             | 506 nm                                            |
| Si stepped NP-Mo 120nm-SiN <sub>x</sub> 36 nm | 96.937%                                                            | 94.923%                                   | 99.372%                                             | 644 nm                                            |
| Si stepped NP-Mo 120nm-SiN <sub>x</sub> 48 nm | 90.235%                                                            | 92.293%                                   | 96.891%                                             | 884 nm                                            |
| Si stepped NP-Mo 120nm-SiN <sub>x</sub> 60 nm | 90.926%                                                            | 94.934%                                   | 98.327%                                             | 1014 nm                                           |

**Table S1** Comparison of some indicators of the Si stepped NP/Mo structure, coated with 0, 24, 36, 48, 60 nm SiN<sub>x</sub>, respectively.

| Refs.                         | 19                              | 21                                                       | 28                                                     | 32                              | This work               |
|-------------------------------|---------------------------------|----------------------------------------------------------|--------------------------------------------------------|---------------------------------|-------------------------|
| <b>Material</b>               | Si/TiN/HfO <sub>2</sub>         | SiO <sub>2</sub> /TiN/SiN <sub>x</sub>                   | Si/W/Al <sub>2</sub> O <sub>3</sub>                    | Si/Mo                           | Si/Mo/SiN <sub>x</sub>  |
| <b>Absorption performance</b> | 94% (300-2300 nm)               | 87% (250-2250 nm)                                        | 95% (220-2600 nm)                                      | 95% (990-1850 nm)               | 95% (220-2000 nm)       |
|                               | -                               | 29% (5-13 μm)                                            | -                                                      | 10% (5 μm)                      | 19% (5-11 μm)           |
| <b>dielectric layer</b>       | 30 nm HfO <sub>2</sub>          | 160 nm SiN <sub>x</sub>                                  | 50 nm Al <sub>2</sub> O <sub>3</sub>                   | -                               | 36 nm SiN <sub>x</sub>  |
| <b>thermal stability</b>      | 1473 K in Ar atmosphere         | 1073 K in vacuum                                         | 1273 K in N <sub>2</sub> atmosphere                    | 1473 K in Ar atmosphere         | 1273 K in Ar atmosphere |
|                               | -                               | -                                                        | -                                                      | -                               | 1073 K in the air       |
| <b>Fabrication method</b>     | hole-mask colloidal lithography | continuously variable spatial frequency photolithography | PS sphere lithography, metal-assisted chemical etching | hole-mask colloidal lithography | PS sphere lithography   |

**Table S2** Comparison of some absorbers/emitters with similar structures.
